# Supplementary material for: Preparation of levofloxacin-imprinted nanoparticles using designed deep eutectic solvents for the selective removal of levofloxacin pollutants from environmental waste water
Source: Royal Society of Chemistry journal article supplement (doi:10.1039/c9an02556a), 2020-01-01
Supplement: c9an02556a1.pdf [file c9an02556a1.pdf]

Preparation of levofloxacin-imprinted nanoparticles  
using designed deep eutectic solvents for the selective  
removal of levofloxacin pollutants from environmental  
waste water

Xiaoxia Li and Kyung Ho Row\*

Department of Chemistry and Chemical Engineering, Inha University,  
Incheon 402-751, Korea

---

### Validation of re-usability

Table S1 lists the regression equations obtained from the calibration curves for the three types of levofloxacin: X is the peak area; Y is the concentration.

To validate the re-usability of the nanoparticles, three levels (5, 25, and 50  $\mu\text{g/mL}$ ) of a levofloxacin standard solution were used in the adsorption test. A 1 mL aliquot of a standard levofloxacin solution was added to the SPE column. After washing, the target was eluted from the SPE column with 1 mL of MeOH-HAc (9:1, v/v). The eluent collected at a constant volume (1 mL) was analyzed by HPLC. This process was repeated three times ( $n = 3$ ) on the same day using the same sorbent. The intra-assay and inter-assay precision was validated in the same step as above.

**Table S1** Calibration plots, LODs, and LOQs for *levofloxacin*.

| Regression equation                  | R <sup>2</sup> | LOD (µg/mL) | LOQ (µg/mL) |
|--------------------------------------|----------------|-------------|-------------|
| $Y = 0.185X \times 10^{-5} + 4.2176$ | 0.9995         | 0.03        | 0.01        |

**Table S2** Validation of re-usability recoveries (n=3) and RSD values of *levofloxacin* standard solution.

| Spiked<br>( $\mu\text{g}/\text{mL}$ ) | Intra-day    |         | Inter-day    |         |
|---------------------------------------|--------------|---------|--------------|---------|
|                                       | Recovery (%) | RSD (%) | Recovery (%) | RSD (%) |
| 5                                     | 99.1         | 0.5     | 97.4         | 1.5     |
| 25                                    | 99.8         | 0.2     | 99.9         | 0.7     |
| 50                                    | 98.6         | 1.4     | 98.3         | 0.3     |
